1 **Downstream Effects: Impact of Antibiotic Pollution on an Aquatic Host-Parasite Interaction**

2

3 Hannah G. Melchiorre<sup>a</sup>, Stephanie O. Gutierrez<sup>a</sup>, Dennis J. Minchella<sup>a</sup>, and J. Trevor Vannatta<sup>a</sup>

4

5 <sup>a</sup> Department of Biological Sciences, Purdue University, 915 W State Street, West Lafayette, Indiana,

6 47907 USA

7

8 Corresponding Author: J. Trevor Vannatta; [vannatta.jona@gmail.com](mailto:vannatta.jona@gmail.com)

9 Open Research Statement: All data and code used for this study are available at

10 <https://github.com/vanna006/antibiotic.schisto>

11

12

13

14

15

16

17

18

19

20

21

22

23

24

## 25 **Downstream Effects: Impact of Antibiotic Pollution on Aquatic Host-Parasite Interactions**

26

### 27 **Abstract**

28 The global increase in antibiotic use has led to contamination of freshwater environments  
29 occupied by parasites and their hosts. Despite the identified impacts of antibiotics on humans and  
30 wildlife, the effect of antibiotics on host-parasite life cycles is relatively unexplored. We utilize  
31 the trematode parasite *Schistosoma mansoni*, and its snail intermediate host *Biomphalaria*  
32 *glabrata* to investigate the influence of an ecologically relevant antibiotic concentration on the  
33 life history characteristics of both parasite and host. Our results demonstrate that antibiotics not  
34 only accelerate parasite development time, but also increase host reproduction and delay  
35 parasite-induced host castration. We propose that antibiotic exposure alters host microbiome  
36 composition, leading to increased host susceptibility and higher parasite production. Using a  
37 mathematical model, we suggest that life history alterations associated with antibiotics are likely  
38 to increase parasite transmission and disease burden. Our study suggests that antibiotic pollution  
39 could impact freshwater ecosystems by influencing host-parasite dynamics and potentially  
40 increase the burden of schistosomiasis in endemic regions.

41 **Keywords:** tetracycline, disease burden, *Schistosoma*, life-history, fecundity, public health

42

### 43 **Introduction**

44 Antibiotic usage is increasing worldwide in association with growing demand in  
45 livestock production, industry, and human healthcare (Daghrir and Droghui, 2013). As a result,  
46 antibiotic contamination from wastewater treatment plants and sewers is often deposited in  
47 freshwaters (Kraemer et al., 2019). Presence of antibiotics in aquatic environments affects the  
48 life forms within them, extending beyond microscopic organisms to other non-target species

49 (Danner et al., 2019, Sundberg and Karvonen, 2018). Although antibiotic concentrations in  
50 freshwater are not typically lethal to non-target organisms, the sublethal impact of runoff on  
51 biotic interactions is largely unknown (Cairns et al., 2018, Kim et al., 2014).

52 The magnitude and severity of antibiotic contamination can have diverse effects  
53 depending on the nature of the biotic system (Sundberg and Karvonen, 2018). Antibiotics can act  
54 as environmental stressors to alter bacterial communities through direct or indirect mechanisms  
55 (Grenni et al., 2018). Antibiotics are designed to decrease pathogenic bacteria within an  
56 organism; however, they also impact overall bacterial community diversity within the  
57 microbiome and alter community function (Yoon and Yoon, 2018, Morley, 2010, Akbar et al.,  
58 2020). Research has shown that the microbiome plays a third-party role in host-parasite  
59 interactions (Abraham et al., 2017, Gall et al., 2016, Knutie et al., 2017a, Knutie et al., 2017b),  
60 however, few studies have explored the effects of sublethal antibiotic exposure on host-parasite  
61 interactions (Morley, 2009).

62 Antibiotics likely have widespread impacts on many host-parasite systems either directly  
63 (by influencing the organisms involved) or indirectly (by influencing predators/prey/parasites of  
64 the organisms involved; Pravdová et al., 2020). For instance, decreased immune responses have  
65 been reported in pond snails following antibiotic exposure (Gust et al., 2013). Within hosts,  
66 reductions in gut microbiome diversity are associated with an increased susceptibility to *S.*  
67 *mansoni* colonization in mice, suggesting a third-party role of microbiome diversity in immune  
68 system regulation (Viera et al., 1987). Additionally, immune priming is naturally induced by the  
69 gut microbiome during *Plasmodium* infections in *Anopheles gambiae*, and removal of this  
70 priming effect resulted in a higher incidence of infection severity and re-infections (Rodrigues et  
71 al., 2010). In other systems, an inverse relationship between host, gut microbiota composition

72 and susceptibility to parasite infection has been described, with differences observed in the  
73 microbiomes of *S. mansoni*- resistant and susceptible *Biomphalaria* snails (Cortés et al., 2020,  
74 Portet et al., 2021). However, the influence of antibiotics in host-parasite systems is not limited  
75 to host microbiomes. The effect of antibiotic contamination on parasite microbiomes has also  
76 recently been shown (Jorge et al., 2021). Parasite bacterial composition can be indirectly altered  
77 by exposing hosts to various antibiotics resulting in divergent influences depending on the  
78 antibiotic used (Jorge et al., 2021). Thus, antibiotic effects such as enhanced susceptibility  
79 discussed above may be related to altered host or parasite microbiome diversity and/or  
80 composition (Pravdová et al., 2020). Understanding the consequences of these altered  
81 microbiomes is urgent as contamination of freshwater ecosystems with various pharmaceuticals,  
82 such as tetracycline, continues.

83 Tetracycline is a common broad-spectrum antibiotic that contaminates freshwater  
84 environments due to its water solubility and widespread use in agriculture (Lin et al., 2013). The  
85 ubiquity of contaminant sources has recently raised concern over increased incidence of  
86 antibiotic resistance (Andrade et al., 2020). As such, antibiotic resistance may be used as a proxy  
87 to locate overlaps between antibiotic contamination and disease prevalence (Andrade et al.,  
88 2020). Despite connections between high rates of tetracycline resistance and prevalence of  
89 parasitic disease, little is known about how these interactions impact host-parasite dynamics,  
90 such as those seen in schistosomiasis (Faleye et al., 2018).

91 *Schistosoma mansoni* is a parasitic blood-fluke that causes the human disease  
92 schistosomiasis in tropical regions and accounts for as many as 200,000 annual deaths (World  
93 Health Organization, 2020). Eggs of *S. mansoni* from infected humans hatch into miracidia, a  
94 larval stage of the parasite, when they contact freshwater. These miracidia can penetrate the snail

95 intermediate host, *Biomphalaria glabrata*. Maturation of the parasite occurs within the snail  
96 gonads leading to castration of the host. The snails release free-swimming larval stages called  
97 cercariae which directly infect humans as the definitive host (CDC, 2018).

98         Given the human toll of schistosomiasis and the use of antibiotics in medicine and  
99 agriculture in tropical regions (Faleye et al., 2018), we designed an experiment to analyze the  
100 effects of tetracycline antibiotic contamination on the life history of *S. mansoni* and its snail host.  
101 The antibiotic chosen for this experiment was tetracycline due to its water solubility, easy  
102 accessibility, and widespread use in agriculture and human medicine (Daghrir and Droghui,  
103 2013). The impact of tetracycline antibiotic exposure on snail growth and reproduction is  
104 debated. Some studies show inhibitory effects (Chernin, 1957, Chernin and Schork, 1960), while  
105 more recent findings show an antibiotic-induced increase in growth and reproduction (Flaherty  
106 and Dodson, 2005, Gaskins et al., 2002). Previous work which demonstrated growth inhibition  
107 used dramatically higher antibiotic doses. Our study focuses on the impact of a low dose,  
108 ecologically relevant concentration of antibiotics on both host and the parasite. We chose a  
109 common concentration found near wastewater treatment plants as residual antibiotic  
110 concentrations can fluctuate from 2ng/L to more than 50µg/L depending on location (Islam and  
111 Gilbride, 2019, Xu et al., 2021). We predicted that tetracycline would accelerate the development  
112 of the parasite, increase parasite reproductive output, and enhance host reproduction potentially  
113 via alterations to the host microbiome composition. Our predictions consider a dynamic  
114 relationship between immune function and infection susceptibility (Hernández-Gómez et al.,  
115 2020, Knutie et al., 2017). Antibiotics influence immune function by modifying bacterial  
116 composition within microbiomes (Akbar et al., 2020), which can impact host defense to  
117 parasites. We then use our results to parameterize an epidemiological model and demonstrate

118 potential long-term consequences of freshwater antibiotic contamination on human disease  
119 burden. Although mechanisms underpinning enhanced host and parasite production due to  
120 antibiotic exposure have yet to be fully explored, our results suggest that antibiotic  
121 contamination may play a significant role in this host-parasite system.

122

## 123 **Methods**

124 One hundred sixty lab-reared *B. glabrata* snails were used in a full factorial experiment  
125 combining parasitic infection and antibiotic exposure for a total of four treatments (antibiotic +  
126 parasite, parasite only, antibiotic only, control; Table S1). Forty snails per treatment were size-  
127 matched ranging from 8-13mm in shell diameter and housed individually in 120ml jars. Prior to  
128 parasite exposure, snails underwent a 4-day acclimation period in well water or well water with  
129 the set concentration of antibiotic. Ecologically relevant concentrations of tetracycline vary from  
130 region to region, but 50µg/L is a common concentration in areas near waste treatment plants and  
131 was used for this experiment (Daghrir and Droghui, 2013, Islam and Gilbride, 2019, Xu et al.,  
132 2021). A 50µg/L solution of antibiotic was replaced every 7 days to maintain efficacy and  
133 minimize the impact of antibiotic degradation (Schmidt et al., 2007). Antibiotic solutions were  
134 prepared by dissolving 1 mg of tetracycline (Research Products International, Tetracycline HCl,  
135 Lot #36063-101361) in 20 L of well-water a few hours prior to use.

136 Each snail in the parasite only treatment and antibiotic + parasite treatment was exposed  
137 to 8 miracidia of *S. mansoni* for 24 hours. Unexposed snails were sham exposed for the same  
138 period of time. Miracidia were harvested from livers of infected mice (in accordance with Purdue  
139 Animal Care and Use Committee protocol #1111000225) by blending in saline and filtering  
140 according to standard protocols (Tucker et al., 2013). To quantify host reproductive output, egg

141 masses were counted and removed from all individual snail housing jars weekly for 9 weeks.  
142 *Biomphalaria* snails are hermaphroditic and can self-fertilize but may also store sperm from  
143 previous encounters. In our experiment, isolation does not ensure self-fertilization as snails were  
144 old enough to have had breeding encounters prior to isolation. To determine the impact of  
145 antibiotics on the rate of development of the parasite and infection prevalence in snails, parasite  
146 production (count of parasite larvae [cercariae]) was assessed weekly in *B. glabrata* beginning  
147 week 4 post exposure until the end of the experiment at week 9. This window coincides with a 4-  
148 week pre-patent period of parasite development where no parasite release occurs, followed by  
149 release of cercariae beginning at approximately week 4.

150 To measure parasite production, snails were placed in well plates with 10mL of well  
151 water and positioned under fluorescent light to allow parasite emergence. After 1 hour, snails  
152 were returned to their respective jars and the presence or absence of cercariae was recorded. If  
153 cercariae were detected, a 1 mL aliquot of well water was taken and all cercariae within the  
154 aliquot counted (Gleichsner et al., 2016). Finally, the survival of snails was checked weekly.

### 155 **Statistical analysis**

156 Data on parasite and host reproduction had considerable zero-inflation. As such, we  
157 constructed mixed effects hurdle models to account for data overdispersion using the glmmTMB  
158 package in R (Brooks et al. 2017). Hurdle models first model the probability of obtaining a zero-  
159 value, similar to logistic regression. Then, if the value is non-zero, hurdle models use a specific  
160 error distribution to further predict host/parasite reproduction. As such, all hurdle model outputs  
161 contain coefficients for a zero-inflated model, predicting the probability of a zero, and a  
162 conditional model, predicting non-zero measurements based on a specific error distribution.  
163 Models were fit with treatment, week of experiment, and treatment \* week of experiment

164 interactions terms as fixed effects except where inclusion of the interaction term was  
165 uninformative. Host individual was used as a random intercept within each model to account for  
166 repeated measures on individual host snails. However, no random slope (week of experiment)  
167 was incorporated as individual snails within a treatment show similar temporal patterns in host  
168 and parasite development at this time scale. Additionally, we generated these hurdle models  
169 using both a Poisson and negative binomial error distribution for non-zero values and used AIC  
170 to determine which model best fit the data. Statistical models were visualized using the effects  
171 package in R 3.6.3.

172         To examine parasite development time, we conducted a time-to-event analysis (survival  
173 analysis) to determine how long post exposure infected snails would begin producing parasites.  
174 Additionally, a survival analysis was run on all individuals within a treatment, irrespective of  
175 infection status, to look for differences in survival among treatments. Examining all individuals  
176 within each treatment was necessary as absence of infection cannot be definitively confirmed  
177 until week 6, meaning infected individuals who died prior to shedding would be unknown. Both  
178 survival analyses were run in R 3.6.3 using the survival and survminer packages. Analysis was  
179 conducted over the course of the 9-week experiment and used to parameterize daily mortality  
180 rates within our mathematical.

## 181 **Mathematical model**

182         In order to further understand how antibiotic contamination may alter disease dynamics,  
183 we adapted the differential equation model of Hoover et al. (2020). We used a base model  
184 without predation or agrochemical pollution, including snail reproduction associated with  
185 fecundity compensation (Minchella and LoVerde, 1981; Figures S1-S3) and delayed castration,  
186 and assumed all female *S. mansoni* worms are paired. These alterations result in the set of



187 differential equations and dynamic variables below. Here, S, E, and I represent susceptible,  
188 exposed, and infected snails, respectively. W represents the mean worm burden in the human  
189 population with M representing the number of female worms, C representing infective parasite  
190 cercariae, and N the total snail population:

191

$$\frac{dS}{dt} = f_N \left( 1 - \frac{N}{\varphi_N} \right) (S + \chi E + \rho I) - \mu_N S - \beta M S$$

$$\frac{dE}{dt} = \beta M S - \mu_N E - \sigma E$$

$$\frac{dI}{dt} = \sigma E - (\mu_N + \mu_I) I$$

$$\frac{dW}{dt} = \lambda C - (\mu_H + \mu_W) W$$

$$M = 0.5 W H m v \pi_m$$

$$C = \theta I \pi_c$$

$$N = S + E + I$$

192 We used our experimental data to calculate the percent change in snail and parasite life  
193 history characteristics in response to antibiotic exposure and altered model parameters  
194 accordingly (Table S2). This exercise is intended only to make qualitative predictions on how  
195 antibiotic exposure may alter disease dynamics. Analysis was run using the deSolve package in  
196 R 3.6.3 (Soetaert et al., 2010).

197

198 **Results**

199 **Parasite Production**

200 Antibiotics accelerated parasite development. Antibiotic + parasite snails released  
201 parasites on average one week earlier than parasite only snails (Survival analysis  $\chi^2= 8.9$ ,  $p =$   
202  $0.003$ , Figure 1). Although significantly earlier parasite release occurred in the antibiotic +  
203 parasite treatment, the number of cercariae released was low. As such, the impact of early  
204 maturation may be limited. Infection prevalence for the antibiotic + parasite and parasite only  
205 treatments were not significantly different at 77% and 59%, respectively (two-sample equality of  
206 proportion test,  $\chi^2= 1.696$ ,  $p = 0.193$ ). Additionally, antibiotics had a dynamic effect on parasite  
207 production over time such that the antibiotic + parasite treatment had lower initial parasite  
208 production but produced more parasites on average over the course of the experiment. (Figure 2  
209 and Table 1, see Figure S4 in the supplement for raw data visualization).

210 **Host Reproduction**

211 Snails in the antibiotic treatment were more likely to lay eggs relative to snails in the  
212 control treatment (Zero-inflation component of Table 2,  $p = 0.005$ , Figure 4, Figure S5). The  
213 antibiotic + parasite treatment had a higher probability of laying eggs than the parasite only  
214 treatment throughout the entire experiment (Zero-inflation component of Table 3,  $p = 0.006$ ).  
215 Additionally, comparison of the parasite treatment with the antibiotic + parasite treatment  
216 suggests an initially similar reproductive output (Figure 3), yet as the infection matured, snails  
217 within the antibiotic + parasite treatment had a higher probability of laying eggs. These snails  
218 evinced delayed castration compared to the parasite only treatment snails (visible as wide  
219 confidence intervals for the parasite treatment in Figure 3, also see the zero-inflation component

220 of Table 3). The observed decrease in eggs laid over time from infected snails in both treatments  
221 is due to parasitic castration (Minchella and LoVerde, 1981).

222 The antibiotic only treatment showed the highest survival, followed sequentially by the  
223 control treatment, then parasite only treatment, and antibiotic + parasite treatment (see  
224 supplemental Figure S6). However, only the antibiotic + parasite versus the parasite only  
225 survival curves were significantly different from one another ( $\chi^2=5.4$ ,  $p = 0.02$ ).

226 Based on our adaptation of a published *S. mansoni* model, our model results suggest that  
227 areas with antibiotic contamination may have increased snail exposure to parasites and more  
228 rapid snail population growth, leading to higher infection prevalence in snails and greater worm  
229 burdens in humans (Figure 5). Additionally, snail exposure and human worm burdens increase  
230 more rapidly in the antibiotic scenario than would otherwise occur (see supplemental Figure S7  
231 for proportional changes in model state variables).

232

## 233 **Discussion**

234 We investigated the impact of an ecologically relevant concentration of tetracycline on  
235 the life history parameters of the trematode parasite *S. mansoni* and its snail intermediate host, *B.*  
236 *glabrata*. We assessed host reproduction and survival as well as parasite production and  
237 development time-in the presence and absence of the antibiotic, tetracycline. Our results suggest  
238 that antibiotics are likely to impact snail and parasite production with potentially significant  
239 ecological ramifications. We show that tetracycline facilitated earlier parasite production by  
240 infected hosts and increased parasite output as the infection matured (Figures 1 and 2,  
241 respectively). Additionally, the presence of antibiotics increased egg laying in uninfected snails  
242 when compared to uninfected, well water controls (Table 2). Lastly, parasitic castration is

243 delayed in the antibiotic + parasite snails, and these snails had a significantly higher egg output  
244 throughout the experiment compared to the parasite only treatment (Table 3). To the best of our  
245 knowledge, this is the first study to document the impact of antibiotic contamination on the host  
246 and parasite life history parameters of this freshwater snail and its medically relevant parasite.

247         Modifications in host-parasite interactions by antibiotic contamination are likely  
248 associated with changing microbiome dynamics (Hernández-Gómez et al., 2020, Knutie et al.,  
249 2017) and correspond to our hypothesized mechanism. Antibiotics often disturb microbiomes by  
250 decreasing useful and/or increasing harmful bacteria (Akbar et al., 2020). Of the four most  
251 common bacterial genera found in the flora of 200 snails, *Acinetobacter* and *Vibrio* are both  
252 responsive to tetracycline, suggesting a biological linkage between antibiotic presence and  
253 infection susceptibility is possible in this system (Portet et al., 2021). The alterations observed in  
254 parasite development time, parasite production, and host production from addition of tetracycline  
255 are congruent with research findings of microbiome-related impaired immune function following  
256 parasitic infection (Portet et al., 2018). Portet et al. (2018) proposed that following infection with  
257 *S. mansoni*, the bacterial microbiome of *B. glabrata* changed its composition, which could  
258 account for the altered immune function. Decreased immune function weakens defense  
259 mechanisms within hosts (Akbar et al., 2020), which can increase susceptibility to parasites and  
260 corresponds with our findings of an accelerated parasite development time in the antibiotic +  
261 parasite treatment (Pravdová et al., 2020). A potential alternative explanation is that the parasites  
262 were more aggressively exploiting their host, indicating increased parasite pathogenicity (Anzia  
263 and Rabajante, 2018, Schlüter-Vorberg and Coors, 2019). Our results suggest that aggressive  
264 exploitation may have been occurring as snails showed significantly lower survival in the

265 antibiotic + parasite treatment compared to the antibiotic control. However, distinguishing  
266 between these two mechanisms will require further study.

267 Another finding consistent with an altered microbiome was the significant increase of  
268 parasite production in the antibiotic + parasite treatment compared to the parasite only treatment  
269 in the final weeks of the experiment. A study conducted by Schlüter-Vorberg and Coors (2019)  
270 found similar results when studying the effects of pharmaceuticals on pathogen virulence.  
271 Schlüter-Vorberg and Coors (2019) demonstrated that chemically induced suppression of  
272 immune systems in *Daphnia* weakens disease resistance by enhancing the virulence of the  
273 parasite and increases the proportion of infected hosts. However, they additionally observed an  
274 increased speed of host sterilization, which contrasts with our findings of a delayed castration  
275 period in hosts. Our initial survival data suggest that the observed increase in reproductive output  
276 may also be associated with increased mortality within infected snails in the antibiotic + parasite  
277 treatment, which could result in a net decrease in parasite fitness. However, our model suggests  
278 that the increased mortality in infected snails is not sufficient to balance the other life history  
279 alterations associated with antibiotic exposure. Considering all factors, parasite transmission and  
280 thus disease burden in humans are likely to increase in regions with sufficient antibiotic  
281 concentrations.

282 Finally, hosts exposed to antibiotics were more likely to lay eggs. Increased reproduction  
283 due to antibiotic exposure has also been shown in other studies of invertebrates (Flaherty and  
284 Dodson, 2005). A similar study investigating the effect of pharmaceuticals on *Daphnia*  
285 reproduction found that chronic exposure to certain types of antibiotics induced significantly  
286 faster development and more reproduction (Flaherty and Dodson, 2005). These influences on  
287 typical development patterns varied depending on both the duration of exposure, and number of

288 pharmaceuticals to which they were exposed. The strongest and most complex effects between  
289 fecundity and antibiotics were observed with long term (30-day) exposure and a combination of  
290 multiple pharmaceuticals mixtures, respectively. In contrast, inhibition of growth and  
291 reproduction have been recorded using a 100  $\mu\text{g}/\text{mL}$  solution of the antibiotic streptomycin  
292 (Chernin, 1957). These contradicting results may have arisen from the drastic 2000-fold  
293 difference in antibiotic concentration used. Our results, which emphasize the potential of  
294 antibiotics to alter host-parasite population dynamics, may have wider implications for food  
295 webs as snails are important herbivores and prey within many systems (Johnson, 2009). The  
296 capacity of antibiotics to change food web dynamics could also manifest as an increased  
297 antibiotic sensitivity in primary producers such as algae, affirming the potential risks of  
298 contamination in non-target species that could additionally influence snail-host populations  
299 (Isidori et al., 2005). For example, tetracyclines are known to impact ecosystems via cytotoxic  
300 effects that limit plant growth and reduce chlorophyll content (Polianciuc et al., 2020). The  
301 findings presented here support the idea that ecologically relevant tetracycline concentrations  
302 accelerate parasite development time, increase reproductive output in parasites, and enhance host  
303 reproduction, possibly through antibiotic-induced changes to the microbiome.

304

## 305 **Conclusion**

306 We are only beginning to understand the impacts of antibiotics on hosts, parasites, and  
307 their interactions. Here, we show that antibiotics influence parasite dynamics by facilitating  
308 earlier parasite production with increasing output as the infection matures. Infected hosts  
309 affected by antibiotic contamination demonstrated increased egg laying and egg output  
310 throughout the experiment when compared to the parasite only treatment. In addition, parasite

311 castration was delayed in hosts exposed to antibiotics. Our study suggests that the continued  
312 widespread use of antibiotics with improper disposal results in residual consequences to  
313 freshwater ecosystems and may increase the burden of schistosomiasis in endemic regions. The  
314 largely unknown ecological and anthropogenic impacts of antibiotic contaminants including - but  
315 not limited to - trophic effects, disease risk, and ecosystem interactions therefore merit further  
316 research. As antibiotic usage increases, its role as a link between human health and host-parasite  
317 interactions emphasizes the need to further explore the consequences of human activity on all  
318 facets of global change.

319

## 320 **Acknowledgements**

321 We would like to thank members of the Minchella lab for providing feedback and assistance in  
322 preparing this manuscript. This research did not receive any specific grant from funding agencies  
323 in the public, commercial, or not-for-profit sectors.

324

## 325 **References**

- 326 Abraham, N. M., Liu, L., Jutras, B. L., Yadav, A. K., Narasimhan, S., Gopalakrishnan, V.,  
327 Ansari, J. M., Jefferson, K. K., Cava, F., Jacobs-Wagner, C., and Fikrig, E. 2017.  
328 Pathogen-mediated manipulation of arthropod microbiota to promote infection. *National*  
329 *Academy of Sciences* 114: E781-E790.
- 330 Akbar, A., Gu, L., Sun, Y., Zhou, Q., Zhang, L., Lyu, K., Huang, Y., and Yang, Z. 2020.  
331 Changes in the life history traits of *Daphnia magna* are associated with the gut microbiota

- 332 composition shaped by diet and antibiotics. *Science of The Total Environment* 705; DOI:  
333 <https://doi.org/10.1016/j.scitotenv.2019.135827>
- 334 Alboukadel, K., Marcin, K., and Przemyslaw, B. 2020. Survminer: Drawing survival curves  
335 using 'ggplot2'. R package version 0.4.8. <https://CRAN.R-project.org/package=survminer>
- 336 Andrade, L., Kelly, M., Hynds, P., Weatherill, J., Majury, A., and O'Dwyer, J. (2020).  
337 Groundwater resources as a global reservoir for antimicrobial-resistant bacteria. *Water*  
338 *Research* 170; DOI: <https://doi.org/10.1016/j.watres.2019.115360>
- 339 Anderson, R. M., and May, R. M. 1991. Infectious diseases of humans: Dynamics and control,  
340 *Oxford University Press*, New York, New York, USA
- 341 Anzia, E. L., and Rabajante, J. F. 2018. Antibiotic-driven escape of host in a parasite-induced  
342 Red Queen dynamics. *Royal Society* 5; DOI :<https://doi.org/10.1098/rsos.180693>
- 343 Brooks, M. E., Kristensen, K., van Benthem, K. J., Magnusson, A., Berg, C. W., Nielsen, A.,  
344 Skaug, H. J., Maechler, M., and Bolker, B. M. 2017. glmmTMB balances speed and  
345 flexibility among packages for zero-inflated generalized linear mixed modeling. *R J*  
346 9:378–400
- 347 Cairns, J., Ruokolainen, L., Hultman, J., Tamminen, M., Virta, M., and Hiltunen, T. 2018.  
348 Ecology determines how low antibiotic concentration impacts community composition  
349 and horizontal transfer of resistance genes. *Communications Biology* 35; DOI:  
350 <https://doi.org/10.1038/s42003-018-0041-7>
- 351 Centers for Disease Control and Prevention. (2018). Schistosomiasis – Biology.  
352 <https://www.cdc.gov/parasites/schistosomiasis/biology.html>



- 353 Chernin, E. 1957. Studies on the biological control of schistosome-bearing snails: Streptomycin-  
354 induced inhibition of growth and reproduction in the schistosome-bearing snail,  
355 *Australorbis glabratus*. *American Journal of Epidemiology* 66: 321-330
- 356 Chernin, E., and Schork, A. R. 1960. Effects of streptomycin on the hatchling of *Australorbis*  
357 *glabratus* eggs. *Experimental Parasitology* 9:9-13
- 358 Cortés, A., Clare, S., Costain, A., Almeida, A., McCarthy, C., Harcourt, K., Brandt, C., Tolley,  
359 C., Rooney, J., Berriman, M., Lawley, T., MacDonald, A. S., Rinaldi, G., and Cantacessi,  
360 C. 2020. Baseline Gut Microbiota Composition Is Associated with *Schistosoma mansoni*  
361 Infection Burden in Rodent Models. *Frontiers in Immunology* 11:593838
- 362 Daghri, R., and Droghui, P. 2013. Tetracycline antibiotics in the environment: A review.  
363 *Environmental Chemistry Letters* 11:209-227
- 364 Danner, M., Robertson, A., Behrends, A., and Reiss, J. 2019. Antibiotic pollution in surface fresh  
365 waters: Occurrence and effects. *Science of the Total Environment* 664:793-804
- 366 Faleye, A. C., Adegoke, A. A., Ramluckan, K., Bux, F., and Strenstrom, T. A. 2018. Antibiotic  
367 residue in the aquatic environment: Status in Africa. *Open Chemistry* 16:890-903
- 368 Flaherty, C. H., and Dodson, S. I. 2005. Effects of pharmaceuticals on *Daphnia* survival, growth,  
369 and reproduction. *Chemosphere* 61:200-207
- 370 Gall, C. A., Reif, K. E., Scoles, G. A., Mason, K. L., Mousel, M., Noh, S. M., and Brayton, K. A.  
371 2016. The bacterial microbiome of *Dermacentor andersoni* ticks influences pathogen  
372 susceptibility. *ISME J* 10:1846-1855
- 373 Gaskins, H. R., Collier, C. T., and Anderson, D. B. 2002. Antibiotics as growth promotants:  
374 Model of action. *Animal Biotechnology* 13:29-42

- 375 Gleichsner, A. M., Cleveland, J. A., and Minchella, D. J. 2016. One stimulus – Two responses:  
376 Host and parasite life-history variation in response to environmental stress. *Evolution*  
377 70:2640-2646
- 378 Goddard, M. J., and Jordan, P. 1980. On the longevity of *Schistosoma mansoni* in man on St.  
379 Lucia, West Indies. *Transactions of The Royal Society of Tropical Medicine and Hygiene*  
380 74:185–191
- 381 Grenni, P., Ancona, V., and Caracciolo, A. B. 2018. Ecological effects of antibiotics on natural  
382 ecosystems: A review. *Microchemical Journal* 136:25-39
- 383 Gust, M., Fortier, M., Garric, J., Fournier, M., and Gagné, F. 2013. Effects of short-term  
384 exposure to environmentally relevant concentrations of different pharmaceutical mixtures  
385 on the immune response of the pond snail *Lymnaea stagnalis*. *Science of the Total*  
386 *Environment* 445-446:210-218
- 387 Hernández-Gómez, O., Wuerthner, V., and Hua, J. 2020. Amphibian host and skin microbiota  
388 response to a common agricultural antimicrobial and internal parasite. *Microbial Ecology*  
389 79:175-191
- 390 Hoover, C. M., Rumschlag, S. L., Strgar, L., Arakala, A., Gambhir, M., de Leo, G. A., Sokolow,  
391 S. H., Rohr, J. R., and Remais, J. V. 2020. Effects of agrochemical pollution on  
392 schistosomiasis transmission: A systematic review and modelling analysis. *Lancet Planet*  
393 *Heal* 4:280–291
- 394 Islam, G., and Gilbride, K. 2016. The effect of tetracycline on the structure of the bacterial  
395 community in a wastewater treatment system and its effects on nitrogen removal. *Journal*  
396 *of Hazardous Materials* 371:130-137

- 397 Isidori, M., Lavorgna, M., Nardelli, A., Pascarella, L., and Parrella, A. 2005. Toxic and  
398 genotoxic evaluation of six antibiotics on non-target organisms. *Science of the Total*  
399 *Environment* 316:87-98
- 400 Johnson, P. D. 2009. Sustaining America's aquatic biodiversity: Freshwater snail biodiversity  
401 and conservation. *Virginia Cooperative Extension Publication* 420-530.
- 402 Jorge, F., Froissard, C., Dheilly, N., and Poulin, R. 2021. Bacterial community dynamics  
403 following antibiotic exposure in a trematode parasite. *International Journal for*  
404 *Parasitology*; DOI: <https://doi.org/10.1016/j.ijpara.2021.11.006>
- 405 Kim, H. Y., Yu, S., Jong, T., and Kim, S. D. 2014. Relationship between trans-generational  
406 effects of tetracycline on *Daphnia magna* at the physiological and whole organism level.  
407 *Environmental Pollution* 191:111-118
- 408 Knutie, S. A., Gabor, C. R., Kohl, K. D., and Rohr, J. R. 2017. Do host-associated gut microbiota  
409 mediate the effect of a herbicide on disease risk in frogs? *Journal of Animal Ecology*  
410 87:489-499
- 411 Knutie, S. A., Wilkinson, C. L., Kohl, K. D., and Rohr, J. R. 2017. Early-life disruption of  
412 amphibian microbiota decreases later-life resistance to parasites. *Nature Communications*  
413 8:86; DOI: <https://doi.org/10.1038/s41467-017-00119-0>
- 414 Kraemer, S. A., Ramachandran, A., and Perron, G. G. 2019. Antibiotic pollution in the  
415 environment: From microbial ecology to public policy. *Microorganisms* 7:180; DOI:  
416 <https://doi.org/10.3390/microorganisms7060180>
- 417 Lin, Y., Xu, S., and Jia Li 2013. Fast and highly efficient tetracyclines removal from  
418 environmental waters by graphene oxide functionalized magnetic particles. *Chemical*  
419 *Engineering Journal* 225:679-685

- 420 McLellan, S. L., Newton, R. J., and Fisher, J. 2015. The microbiome of urban waters.  
421 *International Microbiology* 18:141-149
- 422 Minchella, D. J., and LoVerde, P. T. 1981. A cost of increased early reproductive effort in the  
423 snail *Biomphalaria glabrata*. *The American Naturalist* 118:876-881
- 424 Morley, N. 2010. Interactive effects of infectious diseases and pollution in aquatic molluscs.  
425 *Aquatic Toxicology* 96:27-36
- 426 Morley, N. 2009. Environmental risk and toxicology of human and veterinary waste  
427 pharmaceutical exposure to wild aquatic host-parasite relationships. *Environmental*  
428 *Toxicology and Pharmacology* 27:161-175
- 429 Polianciuc, S. I., Gurzău, A. E., Kiss, B., Stefan, M. G., and Loghin, F. 2020. Antibiotics in the  
430 environment: Causes and consequences. *Medicine and pharmacy reports*, 93: 231–240
- 431 Portet, A., Toulza, E., Lokmer, A., Huot, C., Duval, D., Galinier, R., and Gourbal, B. 2018.  
432 Infection of the *Biomphalaria Glabrata* vector snail by *Schistosoma mansoni* parasites  
433 drives snail microbiota dysbiosis. *BioRxiv*; DOI: <https://doi.org/10.1101/386623>
- 434 Portet, A., Toulza, E., Lokmer, A., Huot, C., Duval, D., Galinier, R., and Gourbal, B. 2021.  
435 Experimental infection of the *Biomphalaria Glabrata* vector snail by *Schistosoma*  
436 *mansoni* parasites drives snail microbiota dysbiosis. *Microorganisms*, 9:1084; DOI:  
437 [doi:10.3390/microorganisms9051084](https://doi.org/10.3390/microorganisms9051084)
- 438 Pravodá, M., Kolářova, J., Grabicová, K., Mikl, L., Bláha, M., Randák, T., Kvsch, Y., Jurjda, P.,  
439 and Ondračková, M. 2020. Associations between pharmaceutical contaminants, parasite  
440 load and health status in brown trout exposed to sewage effluent in a small stream.  
441 *Ecohydrology & Hydrobiology*; DOI: <https://doi.org/10.1016/j.ecohyd.2020.09.001>

- 442 Rodrigues, J., Brayner, F., Alves, L., Dixit, R., and Barillas-Mury, C. 2010. Hemocyte  
443 differentiation mediates innate immune memory in *Anopheles gambiae* mosquitoes.  
444 *Science*, 329:13543-1355
- 445 Schlüter-Vorberg, L., and Coors, A. 2019. Impact of an immunosuppressive human  
446 pharmaceutical on the interaction of a bacterial parasite and its invertebrate host. *Aquatic*  
447 *Toxicology* 206: 91-101
- 448 Schmidt, L. J., Gaikowski, M. P., Gingerich, W. H., Dawson, V. K., and Schreier, T. M. 2007.  
449 An environmental assessment of the proposed use of oxytetracycline-medicated feed in  
450 freshwater aquaculture. *U. S. Geological Survey, Biological Resources Division*.  
451 <https://animaldrugatfda.fda.gov/adafda/app/search/public/document/downloadEA/156>
- 452 Soetaert, K., Petzoldt, T., and Setzer, R. W. 2010. Solving differential equations in R:  
453 Package deSolve. *Journal of Statistical Software* 33:1-25
- 454 Sokolow, S. H., Huttinger, E., Jouanard, N., Hsieh, M. H., Lafferty, K. D., Kuris, A. M., Riveau,  
455 G., Senghor, S., Cheikh, T., N'Diaye, A., Faye, D. S., and De Leo, G. A. 2015. Reduced  
456 transmission of human schistosomiasis after restoration of a native river prawn that preys  
457 on the snail intermediate host. *Proceedings of the National Academy of Sciences of the*  
458 *United States of America* 112:9650–9655
- 459 Sundberg, L. R., and Karvonen, A. 2018. Minor environmental concentrations of antibiotics can  
460 modify bacterial virulence in co-infection with a non-target parasite. *Royal Society* 14;  
461 DOI: <https://doi.org/10.1098/rsbl.2018.0663>
- 462 Tchounwou, P. B., Englande, A. J., Malek, E. A., and Greer, G. J., Anderson. 1991. The effects  
463 of bayluscide and malathion on the survival of *Schistosoma mansoni* miracidia. *J*  
464 *Environmental Science and Health Part B* 26:69–82

- 465 Tchounwou, P. B., Englande, A. J., Malek, E. A., and Greer, G. J., Anderson. 1992. The effects  
466 of bayluscide and malathion on the mortality and infectivity of *Schistosoma mansoni*  
467 cercariae. *Environmental Toxicology and Water Quality* 7:107–117
- 468 Therneau, T. 2020. A package for survival analysis in R. R package version 3.2-3, Available:  
469 <https://CRAN.R-project.org/package=survival>
- 470 Tucker, M. S., Karunaratne, L. B., Lewis, F. A., Freitas, T. C., and Yiang, Y. 2013.  
471 Schistosomiasis. *Current Protocols in Immunology* 103 DOI:  
472 <https://doi.org/10.1002/0471142735.im1901s103>
- 473 Willing, B. P., Russell, S. L., and Finlay, B. B. 2011. Shifting the balance: Antibiotic effects on  
474 host-microbiota mutualism. *Nature Reviews Microbiology* 9:233-243
- 475 Viera, L. Q., and Moraes-Santos, T. 1987. Schistosomiasis mansoni: Evidence for a milder  
476 response in germfree mice. *Rev Inst Med Trop Sao Paulo* 29: 37-42
- 477 Woolhouse, M. E. J., and Chandiwana, S. K. 1990. Population biology of the freshwater snail  
478 biomphalaria pfeifferi in the Zimbabwe highveld. *Journal of Applied Ecology* 27:41–59
- 479 World Health Organization. 2020. Schistosomiasis and soil-transmitted helminthiasis: Numbers  
480 of people treated in 2019. *Weekly Epidemiological Record* 95:629-640.  
481 <https://apps.who.int/iris/handle/10665/337573>
- 482 Xu, L., Zhang, H., Xiong, P., Zhu, Q., Liao, C., and Jiang, G. 2021. Occurrence, fate, and risk  
483 assessment of typical tetracycline antibiotics in the aquatic environment: A review.  
484 *Science of the Total Environment* 753:141975; DOI:  
485 <https://doi.org/10.1016/j.scitotenv.2020.141975>
- 486 Yoon, M. Y., and Yoon, S. S. 2018. Disruption of the gut ecosystem by antibiotics. *Yonsei*  
487 *Medical Journal* 59: 4-12

488 Zhang S. and Chen, D. 2019. Facing a new challenge: the adverse effects of antibiotics on gut  
489 microbiota and host immunity. *Chinese Medical Journal* 132: 1135-1138

490

491

492

493

494

495

496

497

498

499

500

501

502

503

504

505

506

507

508

509

510

511 **Tables**

512 Table 1. Model results for parasite production comparing the antibiotic + parasite treatment  
513 relative to the parasite treatment (intercept). Coefficients of the zero-inflation model show the  
514 probability of obtaining a zero value.

| <b>Zero Inflation Model</b> | <b>Coefficient</b> | <b>Standard error</b> | <b>Z value</b> | <b>P value</b> |
|-----------------------------|--------------------|-----------------------|----------------|----------------|
| Intercept                   | 3.841              | 1.180                 | 3.255          | 0.001 *        |
| Antibiotic + parasite       | 1.765              | 2.267                 | 0.778          | 0.436          |
| Week                        | -0.867             | 0.218                 | -3.982         | <0.001 *       |
| Antibiotic + parasite: Week | -0.519             | 0.471                 | -1.102         | 0.270          |
|                             |                    |                       |                |                |
| <b>Conditional Model</b>    |                    |                       |                |                |
| Intercept                   | 4.362              | 0.334                 | 13.069         | < 0.001 *      |
| Antibiotic + parasite       | -1.285             | 0.417                 | -3.083         | 0.002 *        |
| Week                        | 0.021              | 0.047                 | 0.441          | 0.660          |
| Antibiotic + parasite: Week | 0.177              | 0.058                 | 3.058          | 0.002 *        |

515

516

517

518

519

520

521

522

523



524 Table 2. Model results for host reproduction comparing the antibiotic treatment relative to the  
525 control treatment (intercept). Coefficients of the zero-inflation model show the probability of  
526 obtaining a zero value.

| <b>Zero Inflation Model</b> | <b>Coefficient</b> | <b>Standard Error</b> | <b>Z Value</b> | <b>P Value</b> |
|-----------------------------|--------------------|-----------------------|----------------|----------------|
| Intercept                   | -0.812             | 0.540                 | -1.503         | 0.132          |
| Antibiotic                  | -2.166             | 0.700                 | -2.813         | 0.005 *        |
| Week                        | -0.121             | 0.0587                | -2.062         | 0.039 *        |
|                             |                    |                       |                |                |
| <b>Conditional Model</b>    |                    |                       |                |                |
| Intercept                   | 1.107              | 0.095                 | 11.676         | <0.001 *       |
| Antibiotic                  | 0.190              | 0.105                 | 1.813          | 0.070          |
| Week                        | 0.030              | 0.010                 | 2.890          | 0.004 *        |

527

528

529

530

531

532

533

534

535

536

537

538

539

540 Table 3. Model results for host reproduction comparing the antibiotic + parasite treatment  
541 relative to the parasite treatment (intercept). Coefficients of the zero-inflation model show the  
542 probability of obtaining a zero value.

| <b>Zero Inflation Model</b>    | <b>Coefficient</b> | <b>Standard Error</b> | <b>Z Value</b> | <b>P Value</b> |
|--------------------------------|--------------------|-----------------------|----------------|----------------|
| Intercept                      | -7.756             | 1.688                 | -4.596         | <0.001 *       |
| Antibiotic + parasite          | 4.667              | 1.702                 | 2.742          | 0.006 *        |
| Week                           | 2.609              | 0.523                 | 4.989          | <0.001 *       |
| Antibiotic + parasite:<br>Week | -1.820             | 0.505                 | -3.603         | <0.001 *       |
|                                |                    |                       |                |                |
| <b>Conditional Model</b>       |                    |                       |                |                |
| Intercept                      | 1.705              | 0.220                 | 7.733          | <0.001 *       |
| Antibiotic + parasite          | 0.337              | 0.252                 | 1.338          | 0.181          |
| Week                           | -0.201             | 0.111                 | -1.812         | 0.070          |
| Antibiotic + parasite:<br>Week | -0.061             | 0.121                 | -0.502         | 0.616          |

543

544

545

546

547

548

549

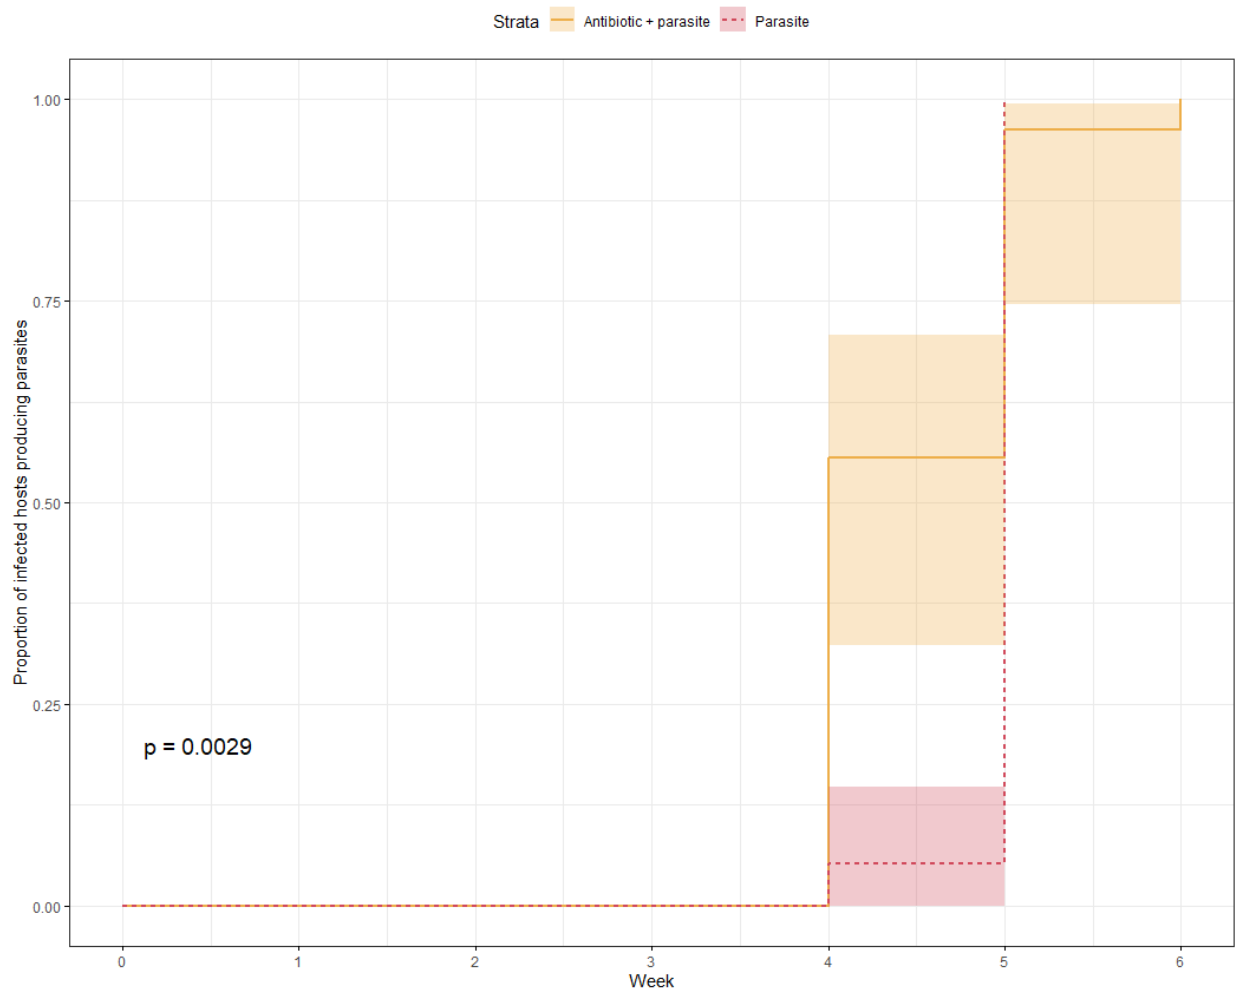

550 Figure 1. Time from initial exposure until snail hosts began producing parasites. The proportion  
551 of *Schistosoma mansoni*- infected snails that released parasite cercariae in the parasite only  
552 treatment (red) and the antibiotic + parasite treatment (gold) was significantly different ( $\chi^2 = 8.9$ ,  
553  $p = 0.0029$ ) with antibiotic + parasite snails releasing parasites earlier than parasite only snails.

554

555

556

557

558

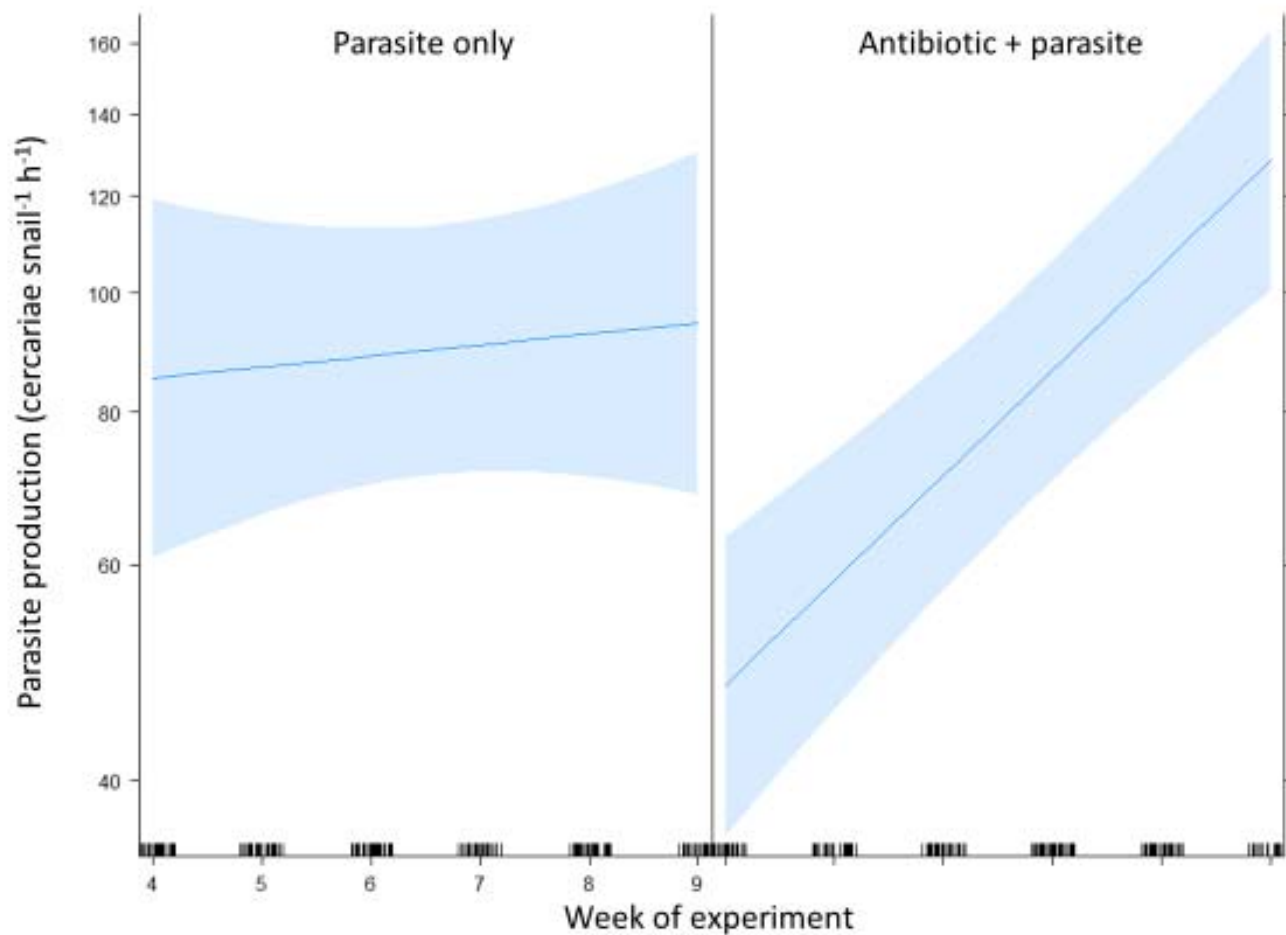

559 Figure 2. Parasite production (cercariae per snail per hour) during the patent period of infection  
560 in the experiment (week 4 – week 9). Antibiotic + parasite snails had initially low parasite  
561 production that increased as the infection progressed compared to the parasite only treatment.  
562 The y axis is on a log scale to account for negative binomially distributed data. See Table 1 for  
563 summary statistics.

564

565

566

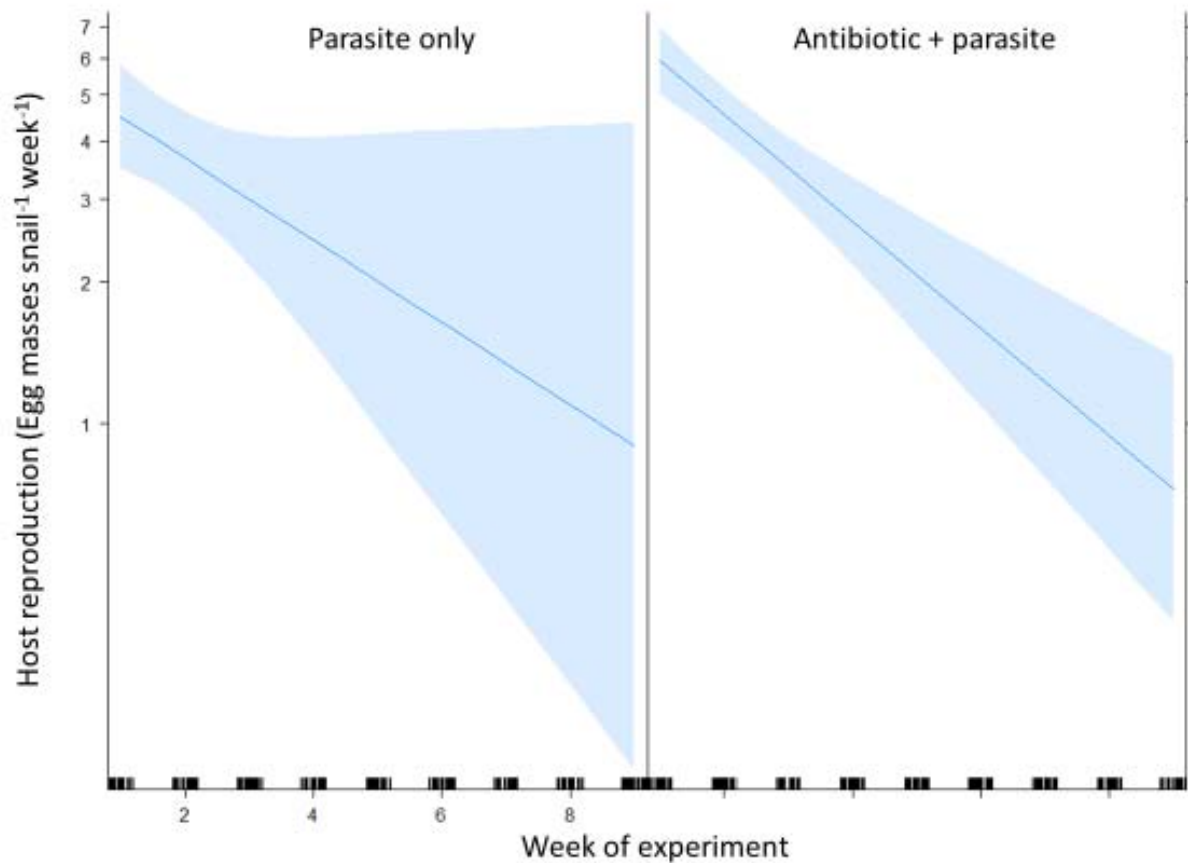

567  
568 Figure 3. Host reproduction (egg masses per snail per week) over the course of the experiment  
569 (week 1 – week 9). Antibiotic + parasite and parasite only treatments have initially similar host  
570 reproductive patterns. However, after week 4, parasite only snails were more likely to lay no  
571 eggs than antibiotic + parasite snails as evinced by wide confidence intervals in the parasite only  
572 treatment. The y axis is on a log scale to account for negative binomially distributed data. See  
573 Table 3 for summary statistics.

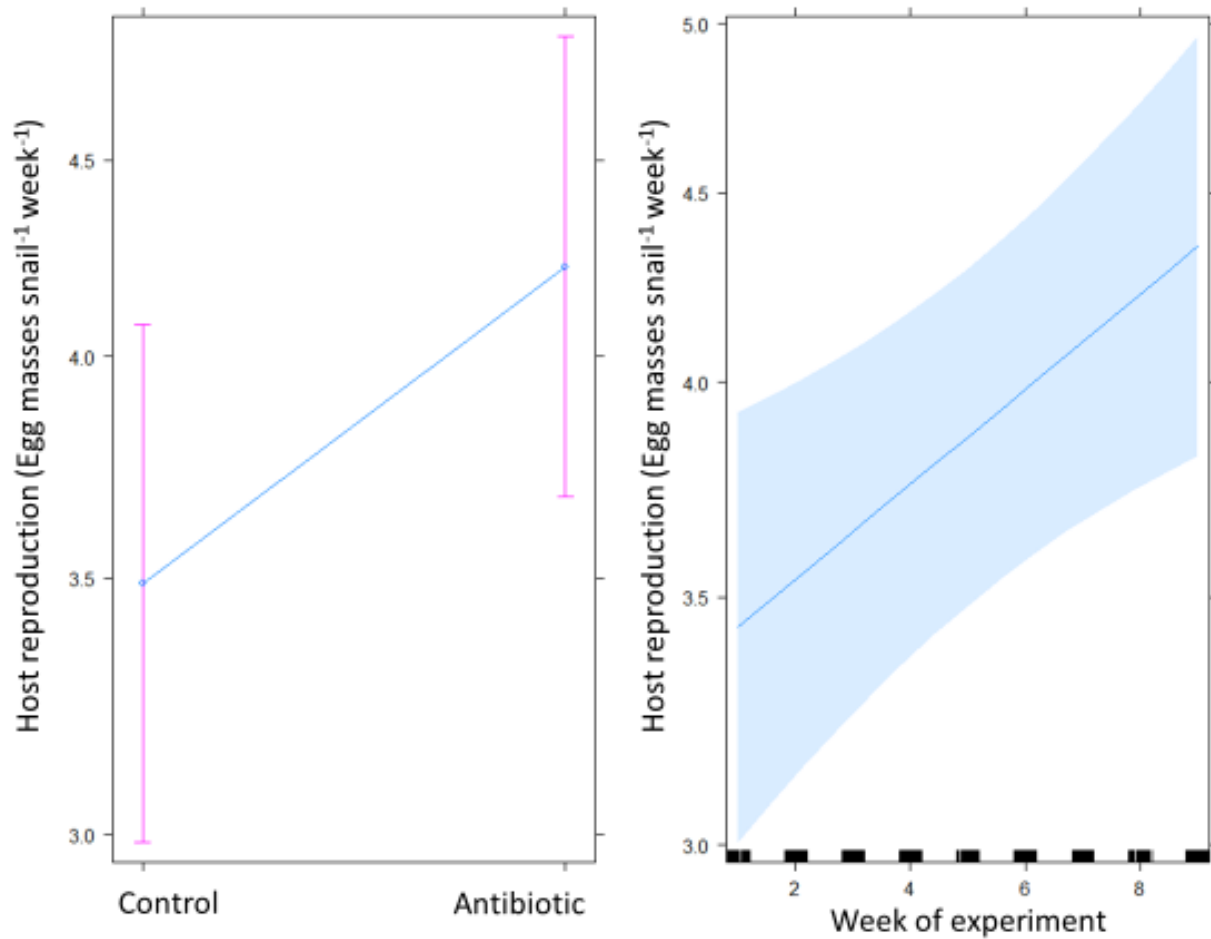

574 Figure 4. Host reproduction (egg masses per snail per week) over the course of the experiment  
575 (week 1 – week 9). Antibiotic only snails were significantly more likely to produce offspring  
576 compared to control snails. Additionally, snails were more likely to produce offspring and  
577 produced more offspring later in the experiment. The interactive effect of treatment \* week was  
578 uninformative in this statistical model and was omitted. See Table 2 for summary statistics.

579

580

581

582

583

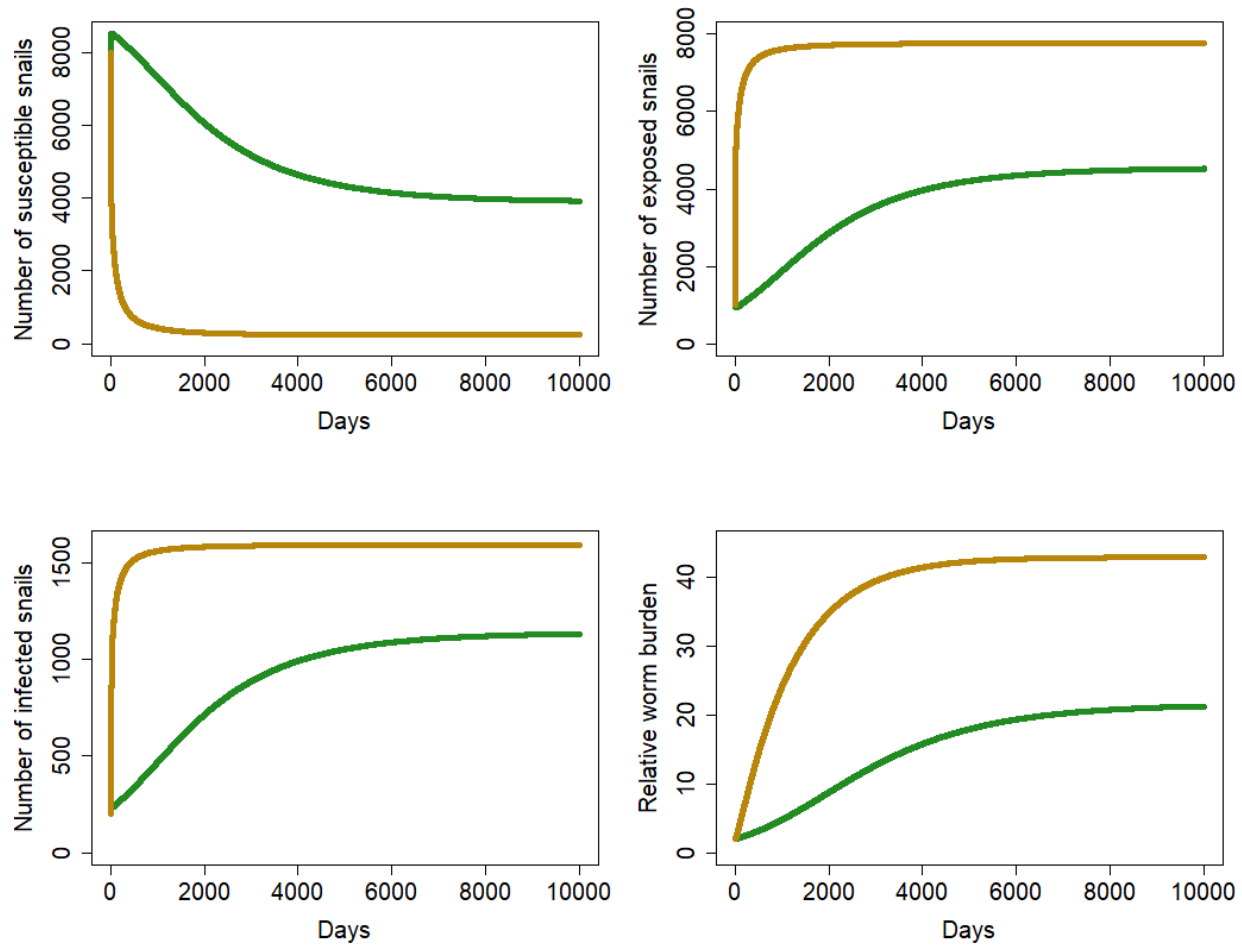

584

585 Figure 5. Model output showing the number of susceptible snails, exposed snails, infected snails,  
586 and mean worm burden in the human population in the antibiotic (gold; data from antibiotic only  
587 and antibiotic + parasite snails) versus control (green; data from control and parasite only snails)  
588 scenarios. Antibiotics are likely to increase *Schistosoma* infections in snails and humans based  
589 on parameterizations generated from our experimental data.

590
